# Supplementary material for: Characterization of monoclonal antibodies that specifically differentiate field isolates from vaccine strains of classical swine fever virus
Source: Front Immunol. 2022 Jul 19;13:930631. doi: 10.3389/fimmu.2022.930631 (PMC9361847; doi:10.3389/fimmu.2022.930631)
Supplement: Supplementary file 5 [file Table_2.xlsx]

## Sheet: Table S1
		Table S2. Reactivity of 108 CSFV strains and BVDV1 with 8 mAbs in IFA and epitopes alignment
		CSFV strains	Sub-genotype	Time (Year)	Province	postive antibody	anti-E2 antibodies						anti-Erns antibodies
						WH303	3H3G6		9A4H4		6B211		1104		1204
							IFA	213EPD215	IFA	271RLGP274	IFA	37LQLNDG42	IFA	100D,V107	IFA	38CKGVP42,W81
	Reference strains	SM	1.1			++++	+++	EPD	++	RLGP	+++	LQLNDG	-	N,T	++	38CKGVP42,W81
		HCLV	1.1			++++	-	GPD	+++	RLGP	++++	LQLNDG	++++	D,V	++	38CKGVP42,W81
	CSFV field strains	XD-1-5	1.1			++++	+++	EPD	+	RLGP	++	LQLNDG	-	N,D	++	38CKGVP42,W81
		XD-1-6	1.1			++++	++++	EPD	+	RLGP	+++	LQLNDG	-	N,D	++	38CKGVP42,W81
		CN001	2.1a	1998	Guizhou	++++	+++	EPD	-	RLAP	-	LQLDDG	-	N,D	++	38CKGVP42,W81
		CN021	2.1a	1996	Yunnan	++++	++	EPD	-	RLAP	-	LQLDDG	-	N,D	++	38CKGVP42,W81
		CN079	2.1a	1996	Yunnan	++++	++++	EPD	-	RLAP	-	LQLDDG	-	N,D	++	38CKGVP42,W81
		CN080	2.1a	1996	Yunnan	++++	++++	EPD	-	RLAP	-	LQLDDG	-	N,D	++	38CKGVP42,W81
		CN147	2.1a	1999	Yunnan	++++	++++	EPD	-	RLAP	-	LQLDDG	-	N,D	++	38CKGVP42,W81
		CN148	2.1a	1999	Sichuan	++++	++++	EPD	-	RLAP	-	LQLDDG	-	N,D	++	38CKGVP42,W81
		CN170	2.1a	1999	Liaoning	++++	++++	EPD	-	RLAP	-	LQLDDG	-	N,D	++	38CKGVP42,W81
		CN174	2.1a	1999	Sichuan	++++	++++	EPD	-	RLAP	-	LQLDDG	-	N,D	++	38CKGVP42,W81
		CN024	2.1b	1998	Henan	++++	++++	EPD	++	RLGP	-	LQLDDG	-	N,D	++	38CKGVP42,W81
		CN025	2.1b	1999	Liaoning	++++	++++	EPD	+++	RLGP	-	LQLDDG	-	N,V	++	38CKGVP42,W81
		CN069	2.1b	1998	Ningxia	++++	++++	EPD	+++	RLGP	-	LQLDDG	-	N,G	++	38CKGVP42,W81
		CN081	2.1b	2016	Liaoning	++++	++++	EPD	+++	RLGP	-	LQLDDG	-	N,D	++	38CKGVP42,W81
		CN093	2.1b	2016	Jilin	++++	++++	EPD	++	RLGP	-	LQLDDG	-	N,D	++	38CKGVP42,W81
		CN096	2.1b	2015	Jilin	++++	++++	EPD	++	RLGP	-	LQLDDG	-	N,D	++	38CKGVP42,W81
		CN112	2.1b	2014	Henan	++++	++++	EPD	++	RLGP	-	LQLDDG	-	N,D	++	38CKGVP42,W81
		CN115	2.1b	2015	Henan	++++	++++	EPD	++	RLGP	-	LQLDDG	-	N,D	++	38CKGVP42,W81
		CN117	2.1b	2015	Henan	++++	++++	EPD	++	RLGP	-	LQLDDG	-	N,D	++	38CKGVP42,W81
		CN118	2.1b	2015	Henan	++++	++++	EPD	+	RLGP	-	LQLDDG	-	N,D	++	38CKGVP42,W81
		CN120	2.1b	2015	Hubei	++++	++++	EPD	++	RLGP	-	LQLDDG	-	N,D	++	38CKGVP42,W81
		CN123	2.1b	2015	Jilin	++++	++++	EPD	+++	RLGP	-	LQLDDG	-	N,D	++	38CKGVP42,W81
		CN125	2.1b	2016	Hubei	++++	-	GPD	++	RLGP	-	LQLDDG	-	N,D	++	38CKGVP42,W81
		CN164	2.1b	1998	Jilin	++++	++++	EPD	++	RLGP	-	LQLDDG	-	N,N	++	38CKGVP42,W81
		CN153	2.1b	1999	Henan	++++	++++	EPD	+++	RLGP	-	LQLDDG	-	N,D	++	38CKGVP42,W81
		CN151	2.1c	1996	Shanghai	++++	++++	EPD	-	RLAP	-	LQLDDG	-	N,D	++	38CKGVP42,W81
		CN032	2.1c	2011	Guangdong	++++	+++	EPD	-	RLAP	-	LQLDDG	-	N,D	++	38CKGVP42,W81
		CN033	2.1c	2011	Guangdong	++++	+++	EPD	-	RLAP	-	LQLDDG	-	N,D	++	38CKGVP42,W81
		CN034	2.1c	2011	Guangdong	++++	+++	EPD	-	RLAP	-	LQLDDG	-	N,D	++	38CKGVP42,W81
		CN038	2.1c	2016	Guangdong	++++	+++	EPD	-	RLAP	-	LQLDDG	-	N,D	++	38CKGVP42,W81
		CN041	2.1c	2016	Hunan	++++	++++	EPD	-	RLAP	-	LQLDDG	-	N,D	++	38CKGVP42,W81
		CN042	2.1c	2017	Guangxi	++++	++++	EPD	-	RLAP	-	LQLDDG	-	N,D	++	38CKGVP42,W81
		CN044	2.1c	2016	Guangxi	++++	++++	EPD	-	RLAP	-	LQLDDG	-	N,D	++	38CKGVP42,W81
		CN045	2.1c	2014	Guangxi	++++	++++	EPD	-	RLAP	-	LQLDDG	-	S,N	++	38CKGVP42,W81
		CN046	2.1c	2017	Guangxi	++++	++++	EPD	-	RLAP	-	LQLDDG	-	N,D	++	38CKGVP42,W81
		CN075	2.1c	1998	Tibet	++++	++++	EPD	-	RLAP	-	LQLDDG	-	N,D	++	38CKGVP42,W81
		CN091	2.1c	2017	Heilongjiang	++++	++++	EPD	-	RLAP	-	LQLDDG	-	N,D	++	38CKGVP42,W81
		CN092	2.1c	2017	Guangdong	++++	++++	EPD	-	RLAP	-	LQLDDG	-	N,D	++	38CKGVP42,W81
		CN101	2.1c	1998	Guangxi	++++	++++	EPD	-	RLAP	-	LQLDDG	-	N,D	++	38CKGVP42,W81
		CN132	2.1c	2017	Hubei	++++	+++	EPD	-	RLAP	-	LQLDDG	-	N,D	++	38CKGVP42,W81
		CN135	2.1c	2015	Shanghai	++++	++++	EPD	-	RLAP	-	LQLDDG	-	N,G	++	38CKGVP42,W81
		CN143	2.1c	1998	Guangxi	++++	++++	EPD	-	RLAP	-	LQLDDG	-	N,D	++	38CKGVP42,W81
		CN145	2.1c	1998	Tibet	++++	++++	EPD	-	RLAP	-	LQLDDG	-	N,D	++	38CKGVP42,W81
		CN146	2.1c	1997	Tibet	++++	++++	EPD	-	RLAP	-	LQLDDG	-	N,D	++	38CKGVP42,W81
		CN159	2.1c	2017	Zhejiang	++++	++++	EPD	-	RLAP	-	LQLDDG	-	N,D	++	38CKGVP42,W81
		CN160	2.1c	2017	Guizhou	++++	++++	EPD	-	RLAP	-	LQLDDG	-	N,D	++	38CKGVP42,W81
		CN169	2.1c	1996	Guangdong	++++	++++	EPD	-	RLAP	-	LQLDDG	-	N,D	++	38CKGVP42,W81
		CN048	2.1g	2011	Guangdong	++++	+++	EPD	-	RLAP	-	LQLDDG	-	N,D	++	38CKGVP42,W81
		CN049	2.1g	2011	Guangdong	++++	+++	EPD	-	RLAP	-	LQLDDG	-	N,D	++	38CKGVP42,W81
		CN051	2.1h	1993	Guangdong	++++	+++	EPD	-	RLAP	-	LQLDDG	-	N,D	++	38CKGVP42,W81
		CN052	2.1h	1994	Guangdong	++++	+++	EPD	-	RLAP	-	LQLDDG	-	N,D	++	38CKGVP42,W81
		CN054	2.1h	1999	Jilin	++++	-	GPD	-	RLAP	-	LQLDDG	-	N,E	++	38CKGVP42,W81
		CN057	2.1h	2016	Hunan	++++	++++	EPD	-	RLAP	-	LQLDDG	-	N,D	++	38CKGVP42,W81
		CN058	2.1h	1999	Guangdong	++++	++++	EPD	-	RLAP	-	LQLDDG	-	N,D	++	38CKGVP42,W81
		CN077	2.1h	1998	Hunan	++++	++++	EPD	-	RLAP	-	LQLDDG	-	N,D	++	38CKGVP42,W81
		CN107	2.1h	1998	Ningxia	++++	++++	EPD	-	RLAP	-	LQLDDG	-	N,D	++	38CKGVP42,W81
		CN111	2.1h	2015	Hebei	++++	-	GPD	-	RLAP	-	LQLDDG	-	N,D	++	38CKGVP42,W81
		CN122	2.1h	2015	Hubei	++++	++++	EPD	-	RLAP	-	LQLDDG	-	N,D	++	38CKGVP42,W81
		CN124	2.1h	2014	Hubei	++++	+++	EPD	-	RLAP	-	LQLDDG	-	N,D	++	38CKGVP42,W81
		CN140	2.1h	1999	Fujian	++++	++++	EPD	-	RLAP	-	LQLDDG	-	N,D	++	38CKGVP42,W81
		CN142	2.1h	1999	Jilin	++++	-	GPD	-	RLAP	-	LQLDDG	-	N,E	++	38CKGVP42,W81
		CN144	2.1h	1999	Guangxi	++++	++++	EPD	-	RLAP	-	LQLDDG	-	N,D	++	38CKGVP42,W81
		CN152	2.1h	1999	Jilin	++++	-	GPD	-	RLAP	-	LQLDDG	-	N,E	++	38CKGVP42,W81
		CN163	2.1h	1998	Ningxia	++++	++++	EPD	-	RLAP	-	LQLDDG	-	N,D	++	38CKGVP42,W81
		CN175	2.1h	1999	Jilin	++++	-	GPD	-	RLAP	-	LQLDDG	-	N,E	++	38CKGVP42,W81
		CN171	2.1h	1998	Ningxia	++++	-	EPY	+	RLGP	-	LQLDDG	-	N,D	++	38CKGVP42,W81
		CN158	2.1i	1999	Guangdong	++++	++++	EPD	+	RLGP	-	LQLDDG	-	N,N	++	38CKGVP42,W81
		CN071	2.1i	1998	Inner Mongolia	++++	++++	EPD	++	RLGP	-	LQLDDG	-	N,N	++	38CKGVP42,W81
		CN063	2.1i	2011	Guangdong	++++	++++	EPD	++	RLGP	-	LQLDDG	-	N,N	++	38CKGVP42,W81
		CN068	2.1j	2015	Guangxi	++++	++++	EPD	++	RLGP	-	LQLDDG	-	N,D	++	38CKGVP42,W81
		CN002	2.2	1999	Anhui	++++	+++	EPD	+++	RLGP	-	LQLDDG	-	N,D	++	38CKGVP42,W81
		CN004	2.2	1994	Guangdong	++++	+++	EPD	+++	RLGP	-	LQLDDG	-	N,D	++	38CKGVP42,W81
		CN006	2.2	1999	Guangdong	++++	++	EPD	+	RLGP	-	LQLDDG	-	N,D	++	38CKGVP42,W81
		CN007	2.2	1998	Henan	++++	-	DPD	+	RLGP	-	LQLDDG	-	N,D	++	38CKGVP42,W81
		CN008	2.2	1999	Jiangsu	++++	+++	EPD	+	RLGP	-	LQLEDG	-	N,D	++	38CKGVP42,W81
		CN011	2.2	1998	Shandong	++++	++	EPD	+	RLGP	-	LQLDDG	-	N,D	++	38CKGVP42,W81
		CN139	2.2	2015	Anhui	++++	+	EPD	++	RLGP	-	LQLDDG	-	N,D	++	38CKGVP42,W81
		CN014	2.2	1998	Shandong	++++	++	EPD	+++	RLGP	+++	LQLNDG	-	N,D	++	38CKGVP42,W81
		CN010	2.2	1998	Qinghai	++++	++++	EPD	+++	RLGP	+++	LQLNDG	-	N,D	++	38CKGVP42,W81
		CN013	2.2	1998	Shandong	++++	++++	EPD	+++	RLGP	+++	LQLNDG	-	N,D	++	38CKGVP42,W81
		CN020	2.2	1997	Guangdong	++++	++++	EPD	++	RLGP	-	LQLDDG	-	N,D	++	38CKGVP42,W81
		CN023	2.2	1999	Hunan	++++	++	EPD	-	RLAP	-	LQLDDG	-	N,D	++	38CKGVP42,W81
		CN070	2.2	1999	Fujian	++++	-	DPD	++	RLGP	-	LQLEDG	-	N,D	++	38CKGVP42,W81
		CN102	2.2	1997	Guangdong	++++	++++	EPD	+++	RLGP	+	LQLNDG	-	N,D	++	38CKGVP42,W81
		CN103	2.2	1996	Guangdong	++++	-	DPD	++	RLGP	-	LQLEDG	-	N,D	++	38CKGVP42,W81
		CN106	2.2	1999	Guangdong	++++	+++	EPD	++	RLGP	++	LQLNDG	-	N,D	++	38CKGVP42,W81
		CN108	2.2	1999	Xinjiang	++++	+++	EPD	++	RLGP	++	LQLNDG	-	N,D	++	38CKGVP42,W81
		CN141	2.2	1999	Fujian	++++	-	DPD	+	RLGP	-	LQLEDG	-	N,D	++	38CKGVP42,W81
		CN149	2.2	1996	Jilin	++++	-	GPD	+++	RLGP	-	LQLDDG	-	N,D	++	38CKGVP42,W81
		CN150	2.2	1998	Guangdong	++++	++++	EPD	++	RLGP	-	LQLDDG	-	N,D	++	38CKGVP42,W81
		CN165	2.2	1998	Henan	++++	-	DPD	++	RLGP	-	LQLEDG	-	N,D	++	38CKGVP42,W81
		CN172	2.2	1998	Henan	++++	-	GPD	++	RLGP	+	LQLNDG	-	N,D	++	38CKGVP42,W81
		CN173	2.2	1999	Heilongjiang	++++	++++	EPD	++	RLGP	-	LQLDDG	-	N,D	++	38CKGVP42,W81
		CN154	2.2	1998	Henan	++++	++++	EPD	++	RLGP	+++	LQLNDG	-	N,D	++	38CKGVP42,W81
		CN005	2.3	1998	Guangdong	++++	-	EPY	+	RLGP	-	LQLDDG	-	N,V	++	38CKGVP42,W81
		CN016	2.3	1990	Guangdong	++++	-	EPY	+	RLGP	-	LQLDDG	-	N,D	++	38CKGVP42,W81
		CN017	2.3	1993	Guangdong	++++	-	EPY	+	RLGP	-	LQLDDG	-	N,V	++	38CKGVP42,W81
		CN018	2.3	1998	Hubei	++++	-	EPY	+	RLGP	-	LQLDDG	-	N,V	++	38CKGVP42,W81
		CN019	2.3	1999	Hainan	++++	-	EPY	++	RLGP	-	LQLDDG	-	N,D	++	38CKGVP42,W81
		CN072	2.3	1999	Inner Mongolia	++++	-	EPY	++	RLGP	-	LQLDDG	-	N,D	++	38CKGVP42,W81
		CN073	2.3	1999	Zhejiang	++++	-	EPY	++	RLGP	-	LQLDDG	-	N,D	++	38CKGVP42,W81
		CN076	2.3	1997	Hunan	++++	-	EPY	++	RLGP	-	LQLDDG	-	N,V	++	38CKGVP42,W81
		CN078	2.3	1998	Guangdong	++++	-	EPY	++	RLGP	-	LQLDDG	-	N,D	++	38CKGVP42,W81
		CN105	2.3	1999	Hainan	++++	-	EPY	++	RLGP	-	LQLDDG	-	N,D	++	38CKGVP42,W81
		CN157	2.3	1998	Inner Mongolia	++++	-	EPY	+	RLGP	-	LQLDDG	-	N,D	++	38CKGVP42,W81
		CN162	2.3	1991	Guangdong	++++	-	EPY	+	RLGP	-	LQLDDG	-	N,D	++	38CKGVP42,W81
	BVDV strain	BVDV1-32	I			-	-	KSE	-	KLGP	-	VRLKDS	-	N,L	-	38CSGVP42,W81
		Mock				-	-		-		-		-		-
